# Supplementary material for: Synthesis, structure, and optical properties of K2.4Ga2.4M1.6Q8(M = Si, Ge; Q = S, Se) crystals and glasses
Source: Royal Society of Chemistry journal article supplement (doi:10.1039/c6ra11079g), 2016-01-01

# Synthesis, Structure, and Optical Properties of $K_{2.4}Ga_{2.4}M_{1.6}Q_8$ ( $M=Si, Ge$ ; $Q= S, Se$ ) Crystals and Glasses

*Jianqiao He,<sup>a,b,c</sup> Xian Zhang,<sup>b</sup> Pan Guo,<sup>d</sup> Ye Cheng,<sup>b</sup> Chong Zheng,<sup>\*e</sup> Fuqiang Huang<sup>\*a,b</sup>*

<sup>a</sup> State Key Laboratory of High Performance Ceramics and Superfine Microstructure and CAS Key Laboratory of Materials for Energy Conversion, Shanghai Institute of Ceramics, Chinese Academy of Sciences, Shanghai 200050, P.R. China.

<sup>b</sup> Beijing National Laboratory for Molecular Sciences and State Key Laboratory of Rare Earth Materials Chemistry and Applications, College of Chemistry and Molecular Engineering, Peking University, 202 Chengfu Road, Beijing 100871, P.R. China.

<sup>c</sup> University of Chinese Academy of Sciences, 19 Yuquan Road, Beijing 100049, P.R. China.

<sup>d</sup> Beijing Computational Science Research Center, Beijing 100094, China.

<sup>e</sup> Department of Chemistry and Biochemistry, Northern Illinois University, DeKalb, Illinois 60115, USA.

**Table S1.** EDS elements ratio of the four compounds.

| Compound | $K_{2.4}Ga_{2.4}Si_{1.6}S_8$ | $K_{2.4}Ga_{2.4}Ge_{0.6}S_8$ | $K_{2.4}Ga_{2.4}Si_{1.6}Se_8$ | $K_{2.4}Ga_{2.4}Ge_{1.6}Se_8$ |
|----------|------------------------------|------------------------------|-------------------------------|-------------------------------|
| K (%)    | 16.8                         | 17.5                         | 17.2                          | 16.6                          |
| Ga (%)   | 18.5                         | 17.2                         | 17.0                          | 18.5                          |
| $M'$ (%) | 11.0                         | 8.7                          | 8.3                           | 10.3                          |
| $Q$ (%)  | 53.7                         | 56.69                        | 57.5                          | 54.5                          |

**Table S2.** Crystallographic data of  $K_{2/3}Ga_{2/3}Ge_{1/3}Se_2$ .

| Formula     | $K_{2/3}Ga_{2/3}Ge_{1/3}Se_2$                                               |
|-------------|-----------------------------------------------------------------------------|
| Space group | Pccn                                                                        |
| Unit cell   | $a=8.1208 \text{ \AA}$<br>$b=8.1208 \text{ \AA}$<br>$c=18.6240 \text{ \AA}$ |
| Volume      | $1228.20 \text{ \AA}^3$                                                     |
| Z           | 12                                                                          |

**Table S3.** Atomic coordinates and for  $K_{2/3}Ga_{2/3}Ge_{1/3}Se_2$ .

| Compounds                     | Ato | Wykoff | $x/a$   | $y/b$   | $z/c$   | sof. |
|-------------------------------|-----|--------|---------|---------|---------|------|
| $K_{2/3}Ga_{2/3}Ge_{1/3}Se_2$ | Se1 | 8e     | 0.90828 | 0.40828 | 0.08333 | 1.0  |
|                               | Se2 | 8e     | 1.09172 | 0.90828 | 0.08333 | 1.0  |
|                               | Se3 | 8e     | 0.90828 | 1.09172 | 0.25000 | 1.0  |
|                               | Ga4 | 4d     | 3/4     | 1/4     | 1/6     | 1.0  |
|                               | Ga5 | 4d     | 3/4     | 1/4     | 1/2     | 1.0  |
|                               | Ge6 | 4d     | 1/4     | 3/4     | 1/6     | 1.0  |
|                               | K7  | 4c     | 1/4     | 1/4     | 1/6     | 0.62 |
|                               | K8  | 4c     | 1/4     | 1/4     | 1/2     | 0.62 |

**Figure S1.** Schematic diagram of  $[KSe_{8/2}]$  square antiprism. Black: K; yellow: Se. Void of the black ball represents K vacancy.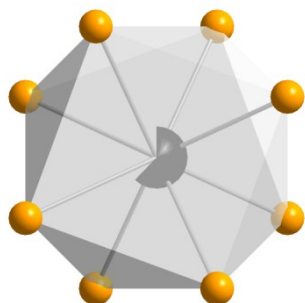**Figure S2.** The PXRD patterns of powder samples of  $K_{2.4}Ga_{2.4}Si_{1.6}S_8$  and  $K_{2.4}Ga_{2.4}Si_{1.6}Se_8$ . The black bars correspond to the theoretical patterns of  $K_{2.4}Ga_{2.4}Si_{1.6}Se_8$ .

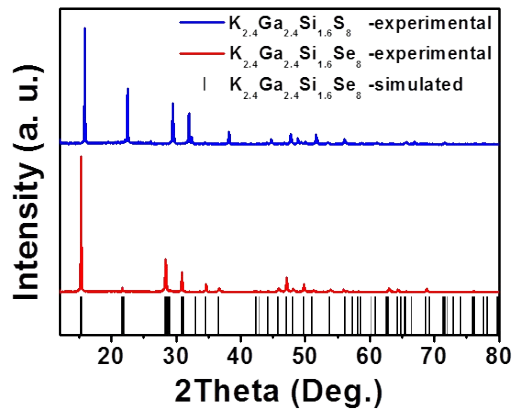

**Figure S3.** The PXRD patterns of powder samples recrystallized from  $K_{2.4}Ga_{2.4}Ge_{1.6}S_8$  and  $K_{2.4}Ga_{2.4}Ge_{1.6}Se_8$  glass at 600 °C for 5 hours. The black bars correspond to the theoretical patterns of  $K_{2.4}Ga_{2.4}Ge_{1.6}Se_8$ .

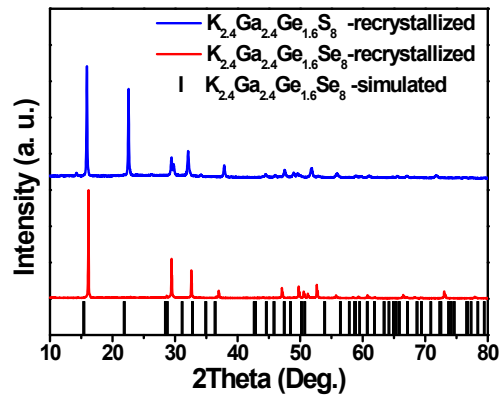

**Figure S4.** UV-Vis absorbance spectra of  $K_{2.4}Ga_{2.4}Ge_{1.6}Q_4$  ( $Q=S, Se$ ) powder and glass samples.

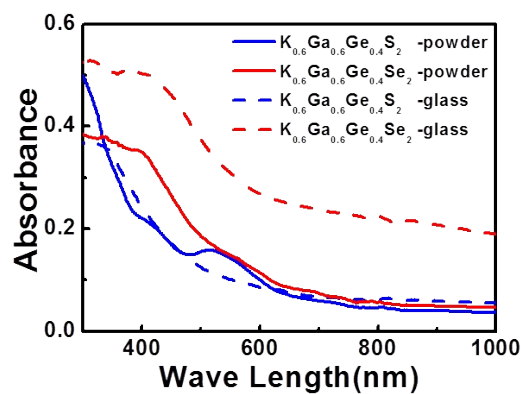

**Figure S5.** Infrared transmission spectra of  $K_{2.4}Ga_{2.4}Ge_{1.6}Q_8$  ( $Q=S, Se$ ) glasses.

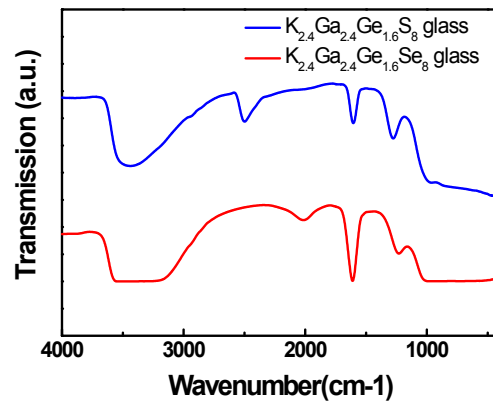

**Figure S6.** DTA curve of  $K_{2.4}Ga_{2.4}Ge_{1.6}S_8$  glass.

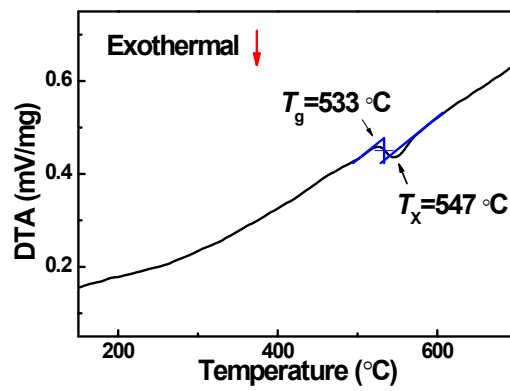

**Figure S7.** (a) Electronic-band structure of  $KGaSe_2$ . (b) Total DOS of  $KGaSe_2$ . (c-d) Partial DOS of Ga and Se in  $KGaSe_2$ . Partial DOS of K are too low and omitted here.

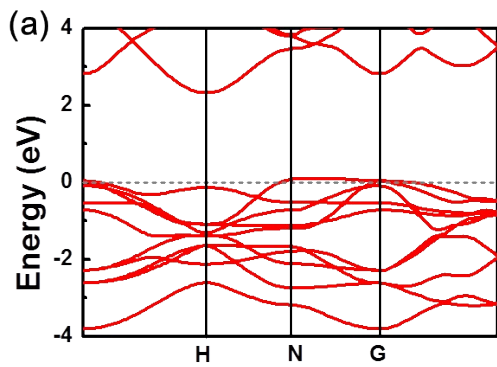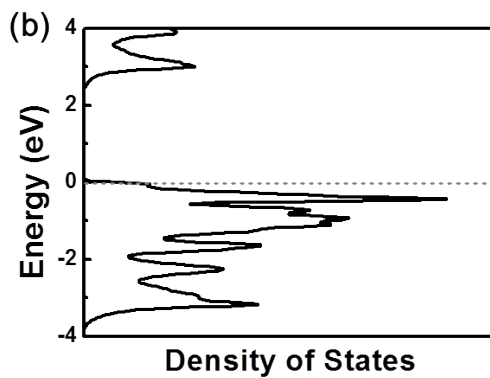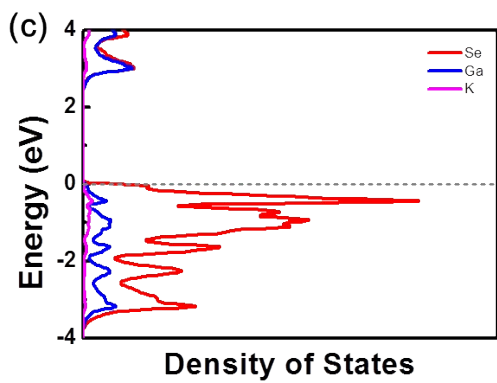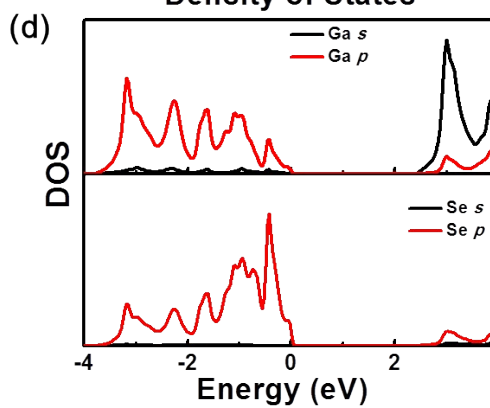

Supplement: c6ra11079g1.pdf [file c6ra11079g1.pdf]
